# Supplementary material for: PrePhyloPro: phylogenetic profile-based prediction of whole proteome linkages
Source: PeerJ journal article supplement (doi:10.7717/peerj.3712), 2017-08-28

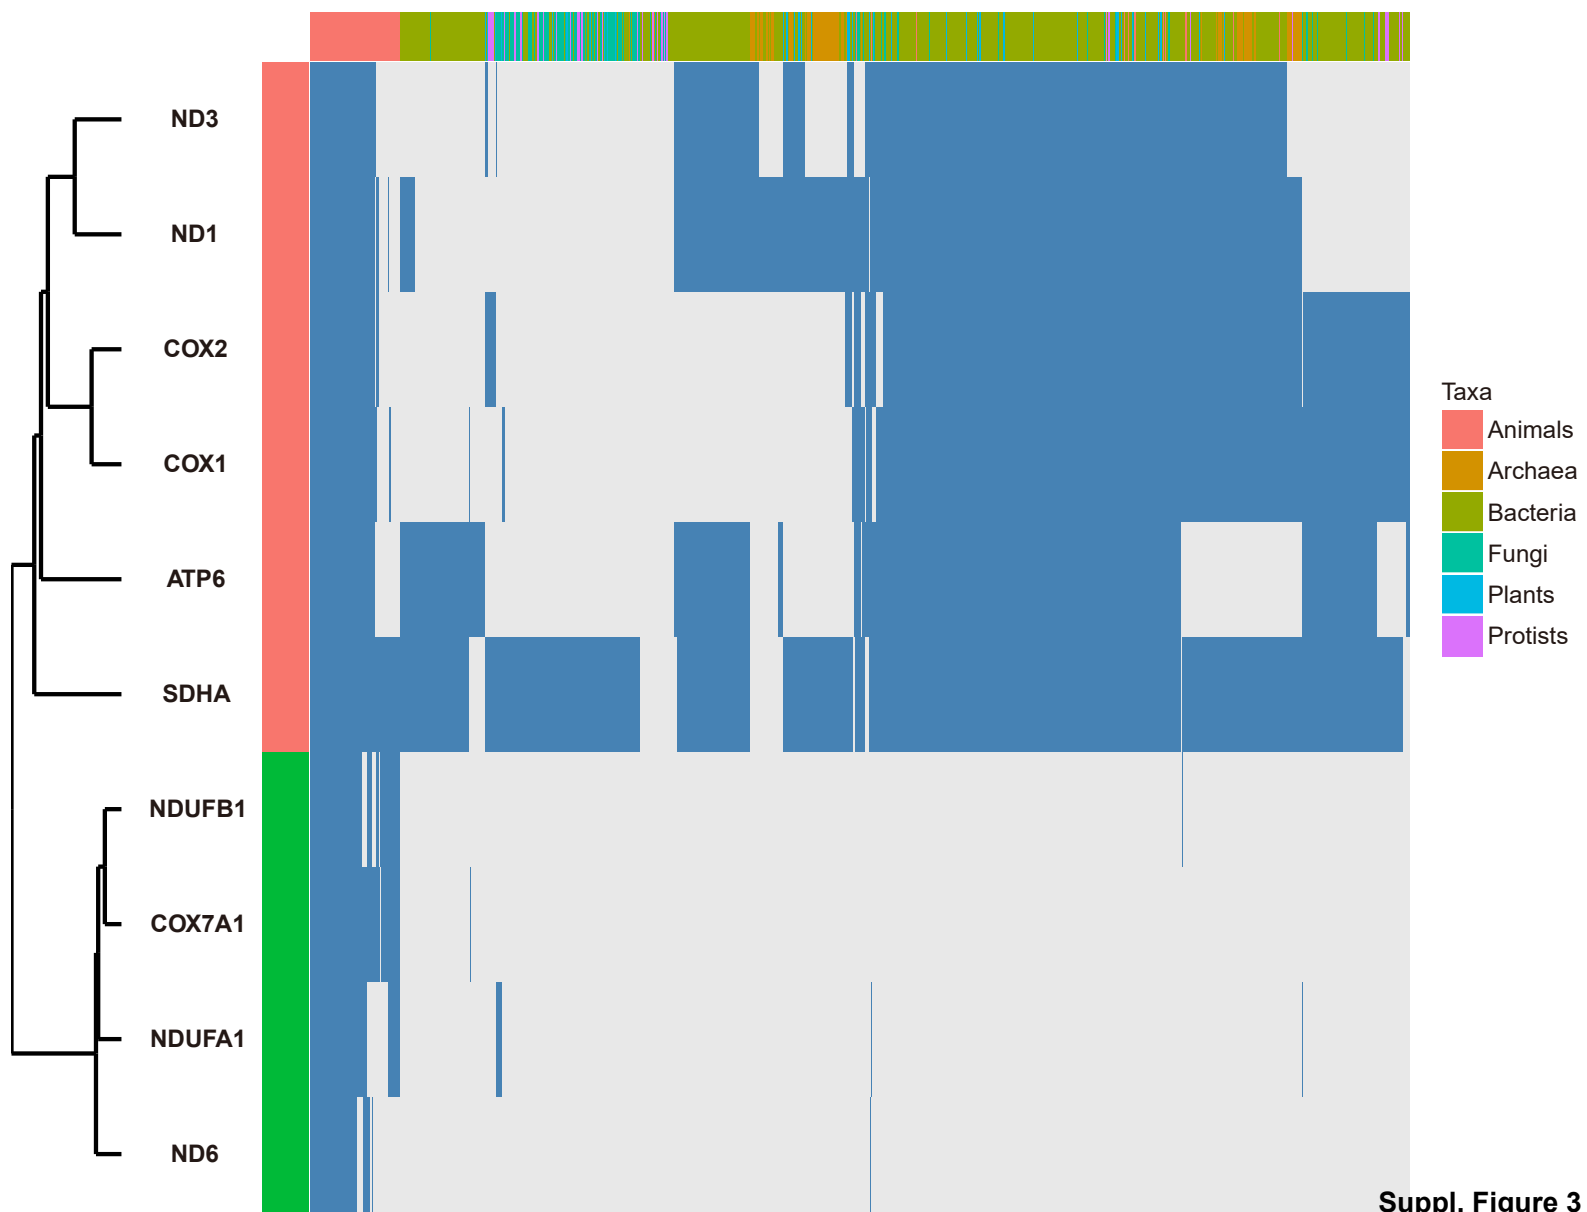

Supplement: Fig_S3.pdf [file Fig_S3.pdf]
